# Supplementary material for: An Ensemble Method with Hybrid Features to Identify Extracellular Matrix Proteins
Source: PLoS One. 2015 Feb 13;10(2):e0117804. doi: 10.1371/journal.pone.0117804 (PMC4334504; doi:10.1371/journal.pone.0117804)
Supplement: S3 Table — Within the list, a smaller index of a feature indicates that it is more important for ECM protein prediction. Such a list of ranked features were used to establish the optimal feature set in the IFS procedure. (XLSX) [file pone.0117804.s003.xlsx]

## Sheet: The IGR result
The first column "order" means in which runs the feature was selected. FFG: Frequencies of Functional Groups, PseAAC: Pseudo Amino Acid Composition, DWT: DiscreteWavelet Transformation, PSSM: Position Speciﬁc Scoring Matrix, SSI: Secondary Structural Information, FDI: Functional Domain Information. The third column is the score for each feature calculated by Information Gain Ratio(IGR).
Order	Feature Name	Score
1	FDI_2	0.458249
2	FDI_6	0.426299
3	FDI_14	0.402067
4	FDI_16	0.402067
5	FDI_17	0.360769
6	PSSM_66	0.19547
7	FDI_1	0.177621
8	PseAAC_23	0.119835
9	FDI_9	0.0949723
10	FDI_4	0.0928251
11	Distribution_18	0.0797236
12	Distribution_13	0.078167
13	Distribution_14	0.0781598
14	Distribution_10	0.0756268
15	Distribution_9	0.0748024
16	Distribution_3	0.0741891
17	Distribution_4	0.0734264
18	Distribution_7	0.0733116
19	FDI_15	0.0713304
20	Distribution_11	0.0711898
21	PSSM_2	0.0653322
22	Distribution_1	0.0640882
23	PSSM_63	0.0598164
24	FFG_10	0.0594272
25	Distribution_12	0.0581737
26	FDI_11	0.0570813
27	FDI_12	0.0570813
28	SSI_7	0.0564797
29	Distribution_15	0.0547794
30	Distribution_6	0.0540312
31	Distribution_17	0.0539644
32	Distribution_16	0.0539313
33	Distribution_8	0.0538048
34	PSSM_62	0.0535854
35	Distribution_20	0.0533079
36	FDI_10	0.0523591
37	SSI_21	0.0518288
38	Distribution_5	0.0510711
39	FDI_13	0.0499432
40	Distribution_2	0.0495095
41	Distribution_19	0.0488271
42	PSSM_76	0.0474288
43	FDI_3	0.0457193
44	PSSM_48	0.0447911
45	PSSM_57	0.0434076
46	PSSM_53	0.0429144
47	PSSM_42	0.0421894
48	SSI_6	0.0405332
49	PSSM_71	0.0386038
50	SSI_49	0.0383757
51	PSSM_11	0.0383017
52	SSI_3	0.0379654
53	Disorder_4	0.0378684
54	PSSM_55	0.0372441
55	DWT_13	0.0356299
56	Disorder_8	0.0356136
57	SSI_50	0.0346952
58	DWT_14	0.0343589
59	SSI_1	0.0343001
60	PSSM_51	0.034245
61	PSSM_56	0.0339744
62	SSI_14	0.0336238
63	Disorder_7	0.033309
64	PseAAC_6	0.0326637
65	PSSM_44	0.0325281
66	PSSM_31	0.0320597
67	PSSM_41	0.0317889
68	DWT_5	0.0314807
69	Disorder_5	0.0314685
70	DWT_10	0.0310188
71	SSI_5	0.0306147
72	DWT_1	0.0302893
73	DWT_9	0.0302488
74	Disorder_6	0.0296479
75	PSSM_61	0.0294076
76	FDI_5	0.0292304
77	PSSM_16	0.0292287
78	PSSM_20	0.028925
79	DWT_6	0.0286814
80	PseAAC_32	0.028439
81	PSSM_72	0.0283782
82	SSI_8	0.0280509
83	PSSM_10	0.0278431
84	Transition_18	0.0277933
85	Transition_21	0.0275231
86	Transition_6	0.0274242
87	Information entropy_2	0.0271316
88	PSSM_30	0.0271301
89	SSI_30	0.0265441
90	Transition_41	0.0264967
91	PSSM_60	0.0264431
92	FFG_7	0.0260394
93	PSSM_79	0.0260342
94	DWT_11	0.0260305
95	Transition_36	0.025573
96	PSSM_1	0.0253516
97	PSSM_47	0.0250183
98	Transition_32	0.0246068
99	Transition_3	0.0244681
100	Transition_40	0.0244199
101	DWT_32	0.0243286
102	PSSM_50	0.0242631
103	PSSM_54	0.0236781
104	Transition_27	0.0236026
105	SSI_36	0.0234618
106	FDI_8	0.0234382
107	Transition_20	0.0234274
108	DWT_4	0.0233537
109	PseAAC_35	0.0233205
110	Transition_22	0.0230838
111	Transition_14	0.0230761
112	DWT_7	0.0229487
113	PSSM_23	0.0228791
114	Transition_7	0.0228096
115	PSSM_40	0.0226476
116	PSSM_52	0.0226422
117	Transition_19	0.0226198
118	PSSM_36	0.0225661
119	PSSM_70	0.0224281
120	PSSM_21	0.0223845
121	SSI_40	0.0223634
122	DWT_3	0.0222688
123	Transition_26	0.0221353
124	PSSM_37	0.0220658
125	PSSM_34	0.0219811
126	PseAAC_13	0.0216475
127	SSI_27	0.0213903
128	Transition_23	0.0208754
129	Transition_2	0.0207763
130	DWT_17	0.0207658
131	DWT_8	0.0206253
132	SSI_2	0.0204464
133	PSSM_13	0.0203175
134	SSI_16	0.0202946
135	DWT_37	0.0202504
136	PSSM_33	0.0201701
137	Transition_44	0.0200981
138	PSSM_80	0.0200387
139	PSSM_35	0.0199983
140	Transition_33	0.019755
141	PSSM_43	0.0197364
142	Transition_31	0.0196954
143	Transition_25	0.0196595
144	PSSM_75	0.0196043
145	PSSM_25	0.0195343
146	PSSM_9	0.0193193
147	SSI_47	0.0191835
148	PSSM_77	0.0191376
149	PSSM_15	0.0191269
150	PseAAC_30	0.0190098
151	PSSM_39	0.0189422
152	SSI_48	0.0189319
153	Transition_10	0.0188762
154	DWT_25	0.0187236
155	PseAAC_24	0.0186973
156	PSSM_65	0.0186681
157	DWT_12	0.0186263
158	PSSM_14	0.0183349
159	PseAAC_38	0.0182696
160	PSSM_73	0.0182398
161	PseAAC_37	0.0182259
162	PSSM_3	0.0181396
163	Transition_12	0.0180888
164	PSSM_74	0.0179154
165	DWT_39	0.0178303
166	DWT_41	0.0177747
167	SSI_46	0.0177236
168	PSSM_32	0.017714
169	PseAAC_29	0.0177088
170	SSI_42	0.0176834
171	Transition_13	0.0174769
172	SSI_37	0.0174514
173	Transition_4	0.0173722
174	SSI_25	0.0173131
175	Transition_34	0.0171106
176	SSI_9	0.0170857
177	Transition_43	0.0170378
178	Transition_5	0.0169145
179	PSSM_19	0.0169139
180	PseAAC_11	0.0168783
181	DWT_27	0.0168026
182	PSSM_45	0.0168004
183	DWT_19	0.0167966
184	SSI_12	0.0167632
185	SSI_26	0.0167258
186	SSI_33	0.0166399
187	DWT_31	0.0164854
188	Disorder_1	0.0163571
189	SSI_34	0.0163035
190	PseAAC_21	0.0161578
191	SSI_45	0.0161573
192	DWT_21	0.0160743
193	SSI_38	0.0160432
194	SSI_35	0.0160015
195	DWT_15	0.0157824
196	Transition_24	0.0156351
197	SSI_32	0.0155038
198	PseAAC_36	0.0152804
199	PSSM_6	0.0151828
200	DWT_33	0.0151668
201	Transition_28	0.0150012
202	PseAAC_20	0.0147447
203	SSI_22	0.0146182
204	PseAAC_39	0.0145508
205	SSI_20	0.0143879
206	Transition_29	0.0143822
207	DWT_29	0.0143442
208	PseAAC_19	0.014326
209	SSI_43	0.0141348
210	DWT_34	0.0140021
211	FFG_3	0.0139679
212	PseAAC_7	0.0139679
213	SSI_23	0.0139561
214	DWT_35	0.0139336
215	Transition_37	0.0138909
216	PseAAC_26	0.0137069
217	Transition_35	0.0136156
218	PseAAC_22	0.0133958
219	PSSM_69	0.0133636
220	SSI_19	0.0133353
221	SSI_28	0.013324
222	SSI_24	0.0132765
223	SSI_39	0.01305
224	PseAAC_10	0.0130318
225	Transition_1	0.0129142
226	Transition_42	0.0128698
227	SSI_10	0.0128614
228	PseAAC_3	0.0127761
229	Transition_17	0.0127398
230	SSI_11	0.0127356
231	SSI_51	0.0127024
232	SSI_31	0.0124573
233	PseAAC_40	0.0122643
234	SSI_29	0.0122228
235	PseAAC_4	0.0119379
236	DWT_30	0.0118257
237	PSSM_5	0.0116392
238	DWT_23	0.0115964
239	PSSM_59	0.0115935
240	SSI_41	0.0114657
241	SSI_18	0.0113991
242	SSI_17	0.0113687
243	PSSM_46	0.0112863
244	PSSM_29	0.0112576
245	Transition_38	0.0112143
246	PSSM_17	0.0111499
247	FFG_6	0.0111256
248	DWT_38	0.0109432
249	PseAAC_27	0.0109038
250	DWT_42	0.0109038
251	FFG_1	0.0108779
252	PseAAC_34	0.0108749
253	PSSM_78	0.0108431
254	Transition_39	0.010791
255	SSI_44	0.0107144
256	Transition_8	0.0107087
257	Transition_11	0.0104889
258	PSSM_22	0.0104295
259	PSSM_38	0.0104276
260	FDI_7	0.0103344
261	Information entropy_1	0.0102421
262	SSI_15	0.0101285
263	PseAAC_14	0.00976823
264	PSSM_24	0.00975162
265	FFG_2	0.00969509
266	PseAAC_15	0.00962742
267	Disorder_3	0.00957194
268	Transition_16	0.00953897
269	DWT_18	0.00947416
270	FFG_4	0.00938901
271	PseAAC_9	0.0093413
272	PseAAC_31	0.00933162
273	PseAAC_28	0.0092715
274	PseAAC_25	0.00921111
275	DWT_22	0.00905161
276	PSSM_58	0.00898192
277	Transition_9	0.00889765
278	PseAAC_17	0.00870744
279	PSSM_12	0.00863163
280	SSI_13	0.00854027
281	PseAAC_2	0.00828809
282	PSSM_18	0.0082199
283	PSSM_8	0.00820833
284	Transition_15	0.00780738
285	DWT_36	0.00769934
286	PseAAC_18	0.00769716
287	PSSM_49	0.00760345
288	DWT_26	0.00734705
289	PseAAC_8	0.00727937
290	FFG_5	0.00722757
291	PseAAC_5	0.00692738
292	PSSM_27	0.00642342
293	DWT_28	0.00629041
294	PSSM_68	0.00616308
295	DWT_16	0.00541529
296	Transition_45	0.00533468
297	PSSM_64	0.00505654
298	PseAAC_33	0.00492783
299	SSI_4	0.0042091
300	PSSM_67	0.00417864
301	Disorder_2	0
302	Transition_30	0
303	DWT_20	0
304	DWT_40	0
305	FFG_8	0
306	FFG_9	0
307	DWT_2	0
308	DWT_24	0
309	PSSM_7	0
310	PSSM_4	0
311	PSSM_28	0
312	PSSM_26	0
313	PseAAC_1	0
314	PseAAC_12	0
315	PseAAC_16	0
